# Supplementary material for: Functional Roles of CD26/DPP4 in Bleomycin-Induced Pulmonary Hypertension Associated with Interstitial Lung Disease
Source: MDPI journal article supplement (doi:10.3390/ijms25020748), 2024-01-06
Supplement: s1 [file s1]

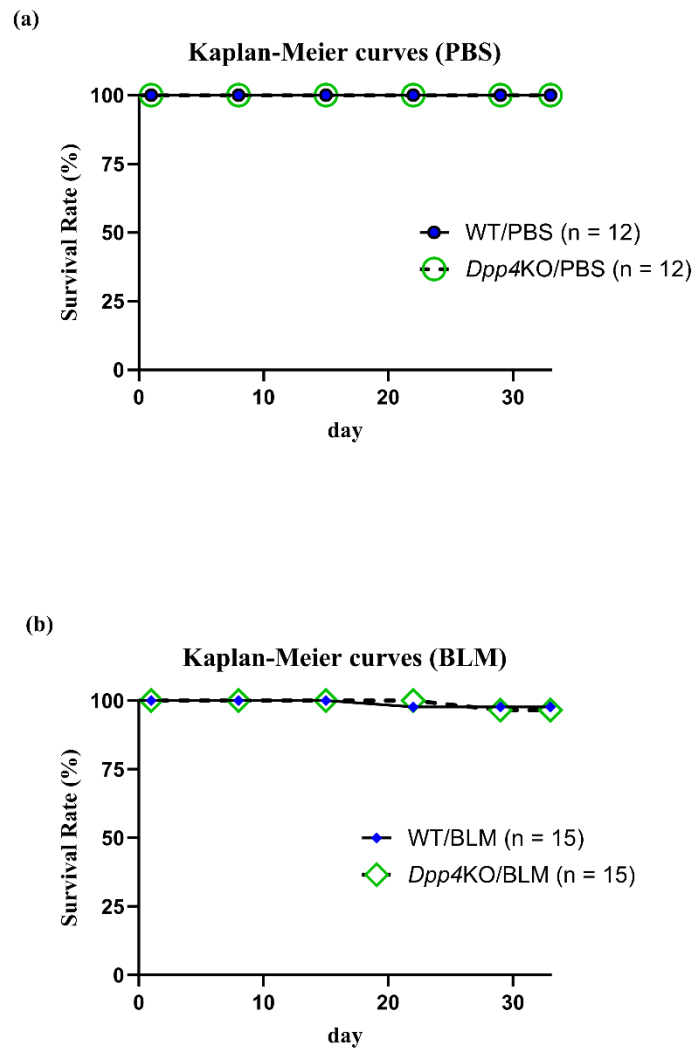

**Supplemental Figure S1.** Survival rates of WT and *Dpp4*KO mice until day 33 determined using the Kaplan–Meier method: (a) treatment with PBS, (b) treatment with BLM.

**Supplemental Table S1.** Details of RT-qPCR primers used in this study.

| Gene        | Forward Primer                   | Reverse Primer                | Melting Temperature (°C)<br>(Forward/ Reverse) |
|-------------|----------------------------------|-------------------------------|------------------------------------------------|
| <i>Dpp4</i> | 5'-CGGTATCATTTA<br>GTAAAGAGGCAAA | 5'-GTAGAGTGTAGA<br>GGGGCAGACC | 64.6 / 63.3                                    |
| <i>DPP4</i> | 5'-GCACGGCAACAC<br>ATTGAA        | 5'-TGAGGTTCTGAA<br>GGCCTAAATC | 63.0 / 62.9                                    |
